# Supplementary material for: Effect of morphologies and compositions of silver-based multicomponent heterogeneous nanocrystals on the reduction of 4-nitrophenol
Source: Royal Society of Chemistry journal article supplement (doi:10.1039/d3na00473b), 2023-01-01
Supplement: d3na00473b1.pdf [file d3na00473b1.pdf]

Table S1 Stability testing of flower Au-AgNC nanocrystal as catalysts:  
 curves fitted with exponential decay equations.

| Concentration of flower-like AgNC | Fitting formula : $I=I_0+A*\exp(-(t-t_0)/B)$ ; B = 1/ reaction constant (K) |                       |        |                       |        |          |
|-----------------------------------|-----------------------------------------------------------------------------|-----------------------|--------|-----------------------|--------|----------|
|                                   | $y_0$                                                                       | $t_0$                 | A      | B                     | K=1/B  | R-square |
| Free catalysts (Flower Au-AgNC)   |                                                                             |                       |        |                       |        |          |
| <i>1<sup>st</sup> cycle rxn</i>   | -0.471                                                                      | 6.938                 | 1.272  | 35.29                 | 0.0283 | 0.953    |
| <i>1<sup>st</sup> cycle rxn</i>   | -0.0146                                                                     | 2.793                 | 1.052  | 71.246                | 0.0140 | 0.975    |
| <i>1<sup>st</sup> cycle rxn</i>   | 115.920                                                                     | 4.45 x10 <sup>6</sup> | -42.86 | 4.51 x10 <sup>6</sup> | ~0     | 0.410    |
| Fixed catalysts (Flower Au-AgNC)  |                                                                             |                       |        |                       |        |          |
| <i>1<sup>st</sup> cycle rxn</i>   | 0.0313                                                                      | -1.623                | 0.953  | 88.15                 | 0.0113 | 0.997    |
| <i>1<sup>st</sup> cycle rxn</i>   | 0.0202                                                                      | -0.324                | 0.978  | 83.39                 | 0.0120 | 0.999    |
| <i>1<sup>st</sup> cycle rxn</i>   | 0.0202                                                                      | -0.324                | 0.979  | 83.26                 | 0.0120 | 0.999    |

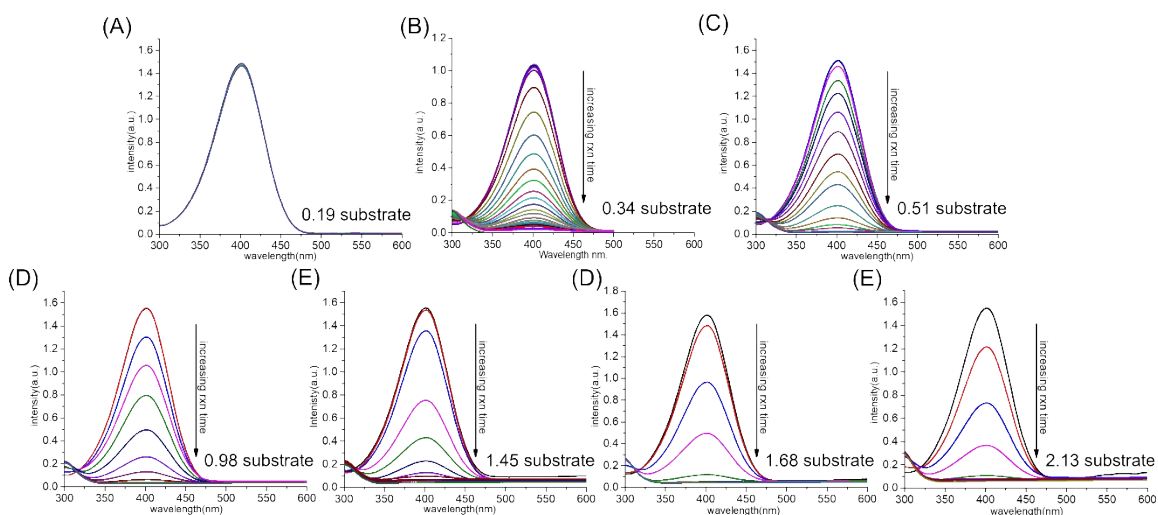

S1 Concentration-dependent reactivity tests of flower Au-AgNC nanocrystals as catalysts freely suspended in the reaction solution were characterized by the change of 4-NP concentration in extinction spectra with reaction time. To compare with the catalytic performance of flower Au-AgNC nanocrystals fixed in a polystyrene matrix, the concentration of flower Au-AgNC nanocrystals freely suspended in the reaction solution was converted into the amount of substrate, which had flower Au-AgNC nanocrystals were fixed on it.

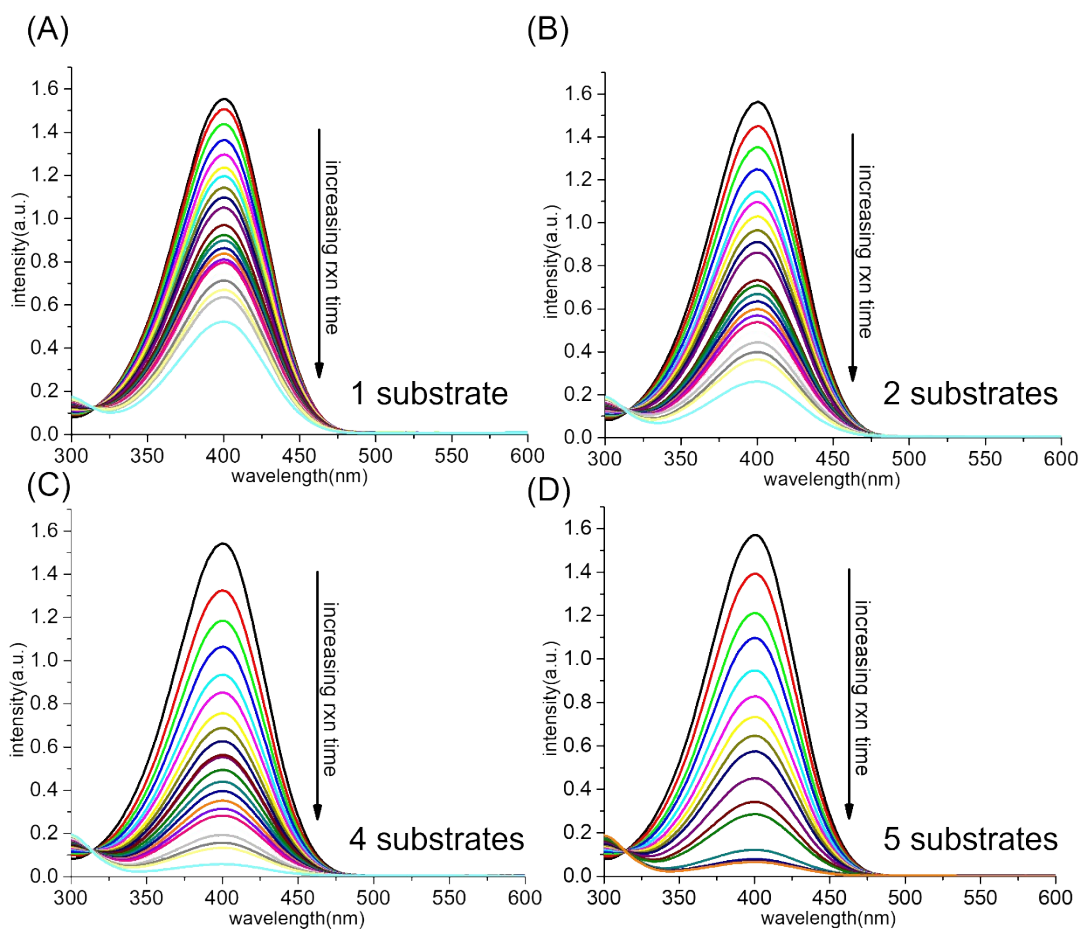

S2 Concentration-dependent reactivity tests of flower Au-AgNC nanocrystals as catalysts fixed in a polystyrene matrix were characterized by the change of 4-NP concentration in extinction spectra with reaction time. The concentration of flower Au-AgNC nanocrystals fixed in a polystyrene matrix was measured by the amount of the substrate.

Table S2 Concentration-dependent reactivity tests of flower Au-AgNC nanocrystal as catalysts freely suspended in reaction solution: curves fitted with exponential decay equations.

| Concentration of free flower Au-AgNC (# of substrate) | Fitting formula : $y=y_0+A*\exp(-(t-t_0)/B)$ ; B = 1/ reaction constant (K) |       |        |        |         |          |
|-------------------------------------------------------|-----------------------------------------------------------------------------|-------|--------|--------|---------|----------|
|                                                       | $Y_0$                                                                       | $t_0$ | A      | B      | K=1/B   | R-square |
| $I_{LSPR} = 0.19$                                     | 1.0616                                                                      | 49.79 | -0.024 | 285.66 | 0.0035  | 0.878    |
| $I_{LSPR} = 0.34$                                     | -0.0057                                                                     | 71.56 | 1.021  | 71.246 | 0.014   | 0.996    |
| $I_{LSPR} = 0.51$                                     | -0.0389                                                                     | 24.00 | 1.016  | 64.526 | 0.0155  | 0.980    |
| $I_{LSPR} = 0.98$                                     | -0.03184                                                                    | 12.00 | 1.038  | 36.208 | 0.02762 | 0.961    |
| $I_{LSPR} = 1.45$                                     | 0.00218                                                                     | 10.99 | 1.002  | 24.506 | 0.04063 | 0.972    |
| $I_{LSPR} = 1.68$                                     | 0.02669                                                                     | 10.18 | 0.922  | 18.514 | 0.05402 | 0.989    |
| $I_{LSPR} = 2.13$                                     | 0.02028                                                                     | 0.146 | 0.989  | 17.600 | 0.05682 | 0.992    |

Table S3 Concentration-dependent reactivity tests of flower Au-AgNC nanocrystal as catalysts fixed in a polystyrene matrix: curves fitted with exponential decay equations.

| Concentration of fixed flower-Au-AgNC (# of substrate) | Fitting formula : $y=y_0+A*\exp(-(t-t_0)/B)$ ; B = 1/ reaction constant (K) |        |       |        |        |          |
|--------------------------------------------------------|-----------------------------------------------------------------------------|--------|-------|--------|--------|----------|
|                                                        | $y_0$                                                                       | $t_0$  | A     | B      | K=1/B  | R-square |
| $I_{LSPR} = 1$                                         | 0.2774                                                                      | 4.302  | 0.716 | 139.17 | 0.0072 | 0.982    |
| $I_{LSPR} = 2$                                         | 0.1195                                                                      | 1.332  | 0.872 | 117.51 | 0.0085 | 0.996    |
| $I_{LSPR} = 4$                                         | 0.0313                                                                      | -1.623 | 0.953 | 88.15  | 0.0113 | 0.961    |
| $I_{LSPR} = 5$                                         | 0.0150                                                                      | 0.067  | 0.988 | 77.12  | 0.0130 | 0.972    |

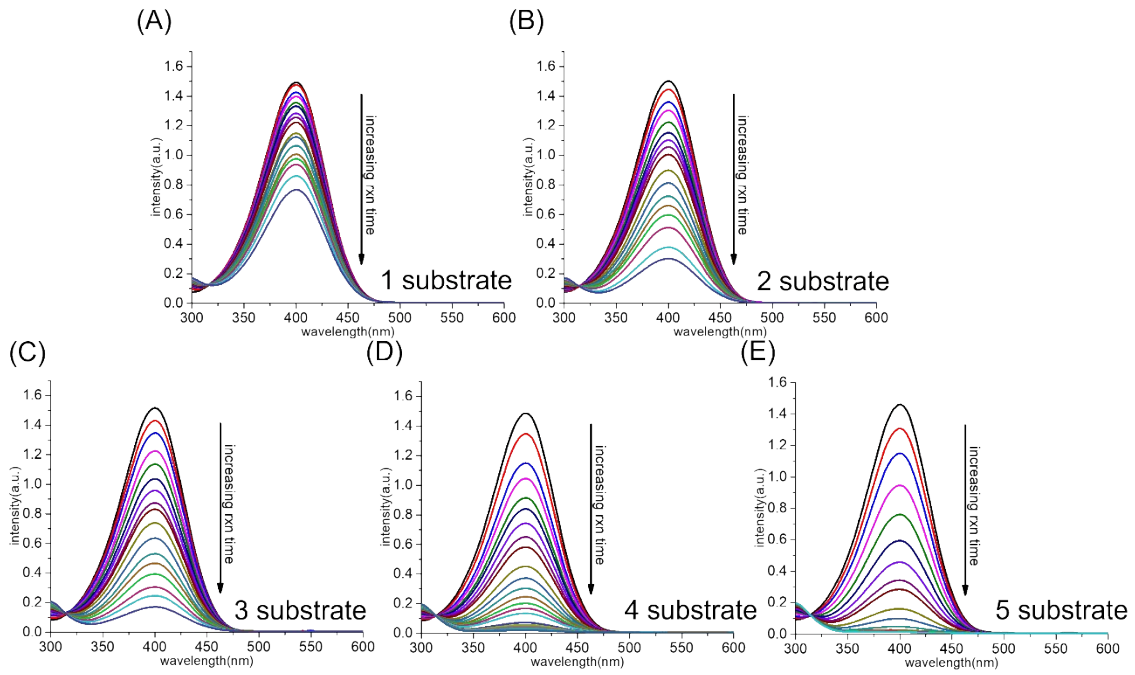

S3 Concentration-dependent reactivity tests of cage Au-AgNC nanocrystals as catalysts fixed in a polystyrene matrix were characterized by the change of 4-NP concentration in extinction spectra with reaction time. The concentration of cage Au-AgNC nanocrystals fixed in a polystyrene matrix was measured by the amount of the substrate.

Table S4 Concentration-dependent reactivity tests of cage Au-AgNC nanocrystal as catalysts fixed in a polystyrene matrix: curves fitted with exponential decay equations.

| Concentration of fixed cage- Au-AgNC (# of substrate) | Fitting formula : $y=y_0+A*\exp(-(t-t_0)/B)$ ; B = 1/ reaction constant (K) |        |       |        |        |          |
|-------------------------------------------------------|-----------------------------------------------------------------------------|--------|-------|--------|--------|----------|
|                                                       | $y_0$                                                                       | $t_0$  | A     | B      | K=1/B  | R-square |
| $I_{LSPR} = 1$                                        | 0.4444                                                                      | 2.781  | 0.560 | 191.33 | 0.0052 | 0.994    |
| $I_{LSPR} = 2$                                        | 0.1104                                                                      | -0.199 | 0.901 | 163.28 | 0.0061 | 0.998    |
| $I_{LSPR} = 3$                                        | 0.0803                                                                      | 0.600  | 0.933 | 114.92 | 0.0087 | 0.998    |
| $I_{LSPR} = 4$                                        | 0.0116                                                                      | -0.229 | 0.990 | 84.42  | 0.0118 | 0.999    |
| $I_{LSPR} = 5$                                        | -0.0420                                                                     | 2.629  | 1.053 | 55.69  | 0.0180 | 0.988    |

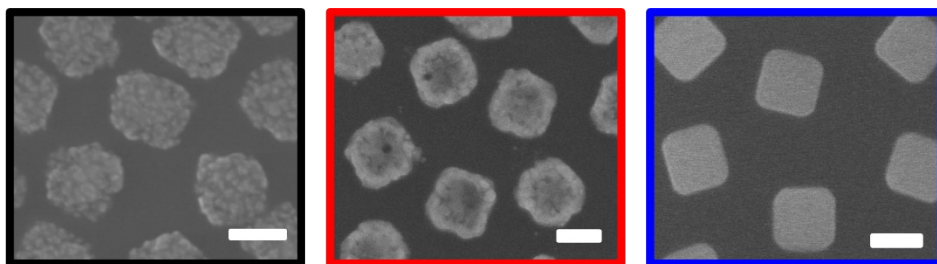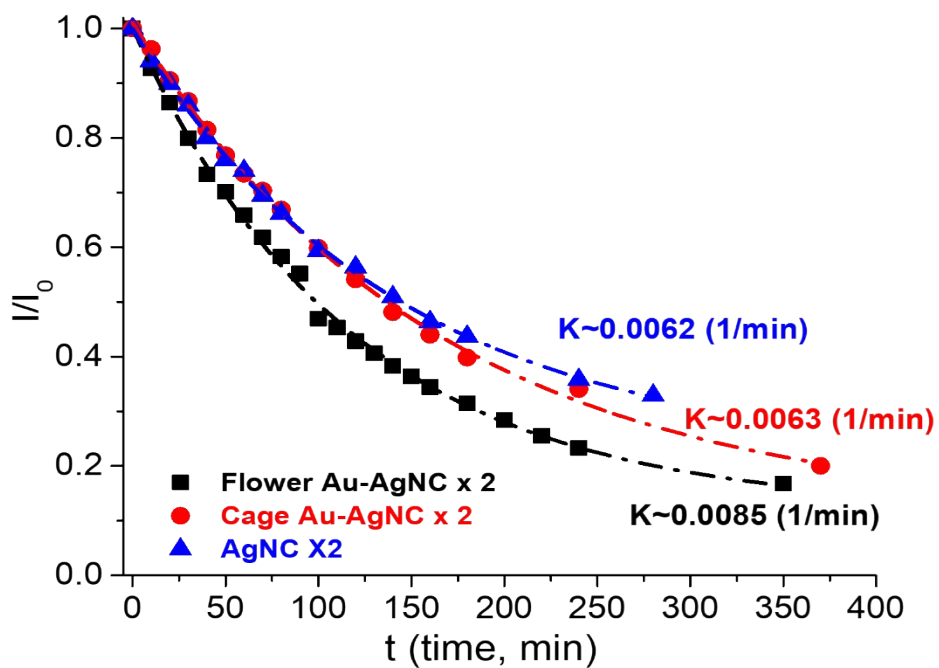

S4 Shape-dependent reactivity tests of silver-based nanocrystals as catalysts fixed in a polystyrene matrix. SEM images showed three different morphologies of silver-based nanocrystals: flower Au-AgNC (black), cage Au-AgNC (red), and pristine AgNC (blue). Changes in the concentration of 4-NP with three different morphologies nanocrystal as catalysts decayed exponentially with reaction time. The scale bar was 100 nm.

(A)

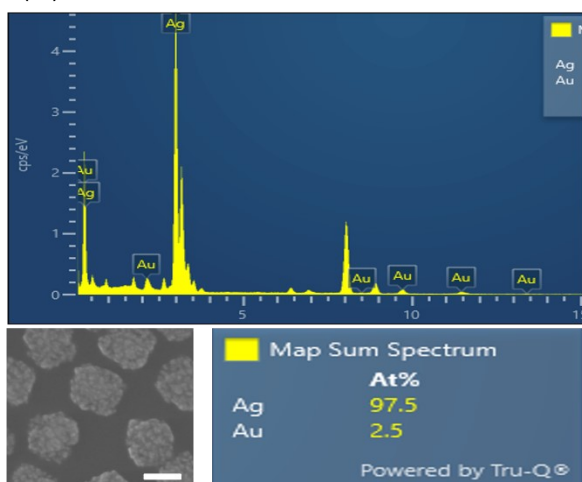

(B)

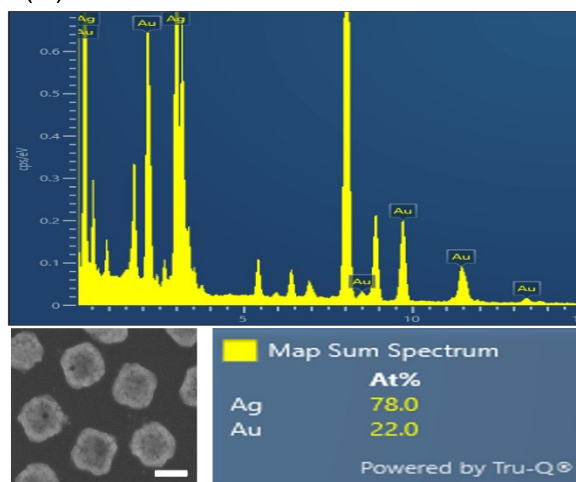

S5 Energy-dispersive X-ray spectroscopy (EDS) of flower Au-AgNC nanocrystal (A) and cage Au-AgNC nanocrystal (B) exhibited that the gold content in flower Au-AgNC nanocrystal was 2.5 at% and the gold content in cage Au-AgNC nanocrystal was 22.0 at%.



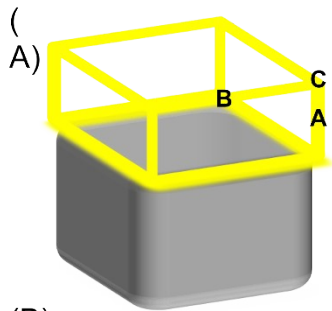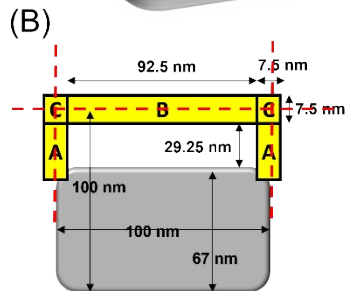

(C) Length of AgNC = 100 nm Embedded depth of AgNC = 67 nm  
width of cage Au-AgNC = 7.5 nm

Surface area of A :  $7.5 \times (33 - 7.5/2) \text{ nm}^2$

Surface area of B :  $7.5 \times (100 - 7.5) \text{ nm}^2$

Surface area of C :  $7.5 \times 7.5 \text{ nm}^2$

# of A in half-cage Au-AgNC :  $4 \times 4$

# of B in half-cage Au-AgNC :  $4 \times 4$

# of C in half-cage Au-AgNC :  $(6-3) \times 4$

(D) Total surface area in half-cage Au-AgNC  
 $= 4 \times 4 \times 7.5 \times 29.25 + 4 \times 4 \times 7.5 \times 92.5 + 3 \times 4 \times 7.5 \times 7.5 = 14835 \text{ nm}^2$   
 Total surface area in embedded AgNC  
 $= 4 \times 33 \times 100 + 100 \times 100 = 23200 \text{ nm}^2$

S6 Theoretical calculation of the surface area of cage-like Au-AgNC and pristine AgNC as 4-NP reduction catalysts. (A) schematic of cage-like Au-AgNC. (B) schematic cross-section of cage-like Au-AgNC. (C) theoretical calculation of the surface area of cage-like Au-AgNC. (D) Theoretical calculation of the surface area of pristine AgNC.

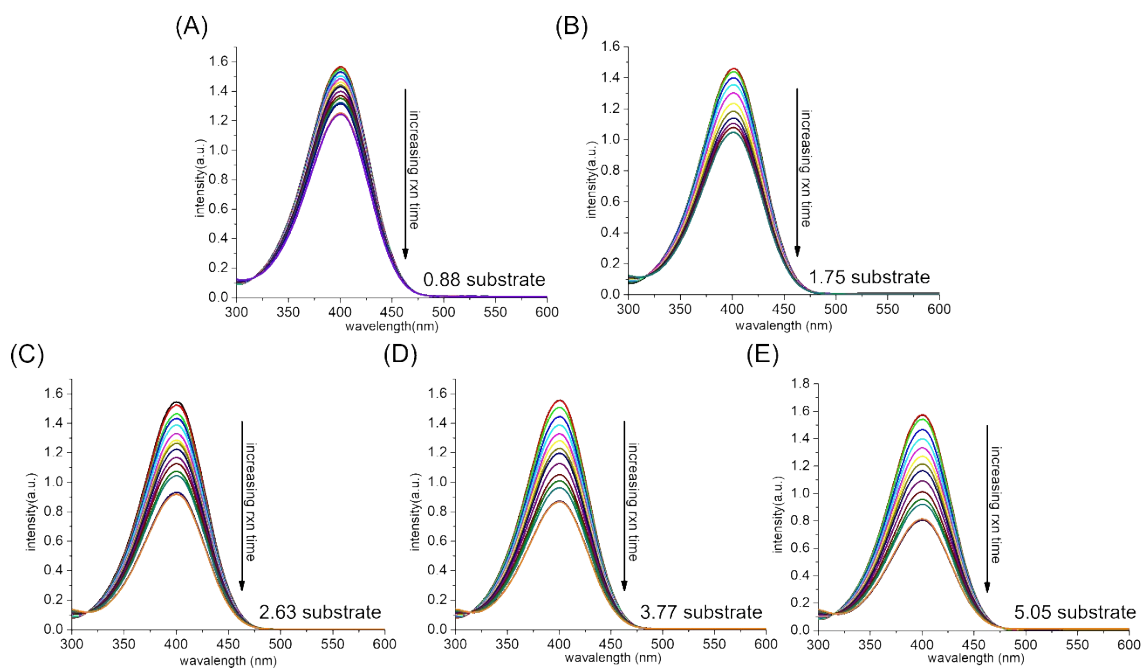

S7 Concentration-dependent reactivity tests of  $\text{Ag}_2\text{S-AgNC}$  nanocrystals as catalysts fixed in a polystyrene matrix were characterized by the change of 4-NP concentration in extinction spectra with reaction time. The concentration of cage  $\text{Ag}_2\text{S-AgNC}$  nanocrystals fixed in a polystyrene matrix was measured by the amount of the substrate, which was adjusted by the number of nanocrystals in a polystyrene matrix.

Table S5 Concentration-dependent reactivity tests of Ag<sub>2</sub>S-AgNC nanocrystal as catalysts fixed in a polystyrene matrix: curves fitted with exponential decay equations.

| Concentration of fixed core shell-<br>Ag <sub>2</sub> S- AgNC (# of substrate) | Fitting formula : $y=y_0+A*\exp(-(t-t_0)/B)$ ; B = 1/ reaction constant (K) |                |       |        |        |          |
|--------------------------------------------------------------------------------|-----------------------------------------------------------------------------|----------------|-------|--------|--------|----------|
|                                                                                | y <sub>0</sub>                                                              | t <sub>0</sub> | A     | B      | K=1/B  | R-square |
| I <sub>LSPR</sub> = 0.88                                                       | 0.7200                                                                      | 16.085         | 0.270 | 195.73 | 0.0051 | 0.994    |
| I <sub>LSPR</sub> = 1.75                                                       | 0.6690                                                                      | 10.878         | 0.326 | 156.34 | 0.0064 | 0.990    |
| I <sub>LSPR</sub> = 2.63                                                       | 0.5129                                                                      | 9.306          | 0.468 | 140.75 | 0.0071 | 0.987    |
| I <sub>LSPR</sub> = 3.77                                                       | 0.4761                                                                      | 9.153          | 0.519 | 124.10 | 0.0080 | 0.990    |
| I <sub>LSPR</sub> = 5.05                                                       | 0.4238                                                                      | 22.828         | 0.517 | 123.48 | 0.0081 | 0.984    |

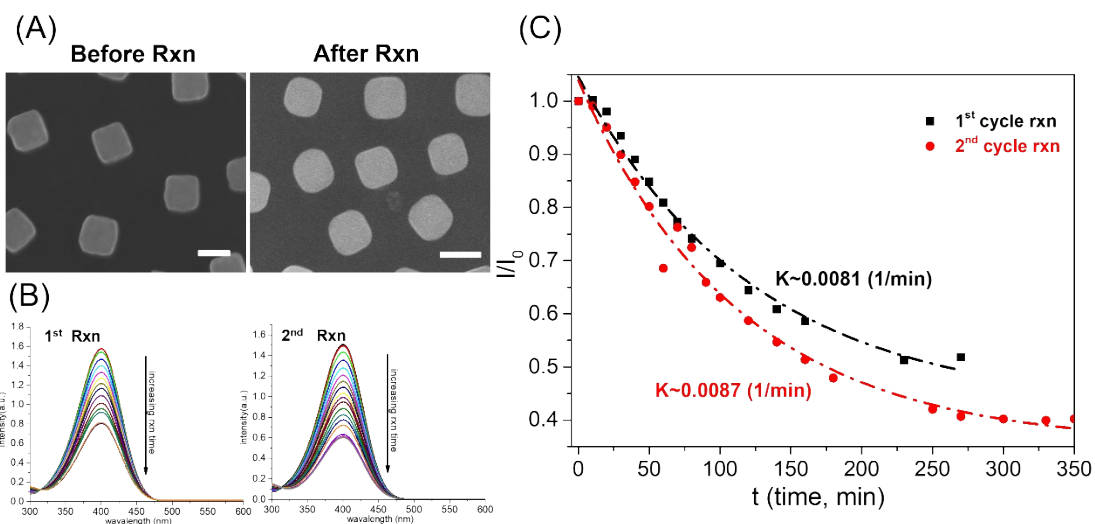

S8 The morphology of  $\text{Ag}_2\text{S-AgNC}$  nanocrystals changed with the reaction as shown in (A). The stability tests of  $\text{Ag}_2\text{S-AgNC}$  nanocrystals fixed as catalysts in a polystyrene matrix were characterized by the change in extinction spectra with reaction time as shown in (B). (C) Changes in the concentration of 4-NP during 1<sup>st</sup> cycle (black point) and 2<sup>nd</sup> cycle (red points) reaction decayed exponentially with reaction time.

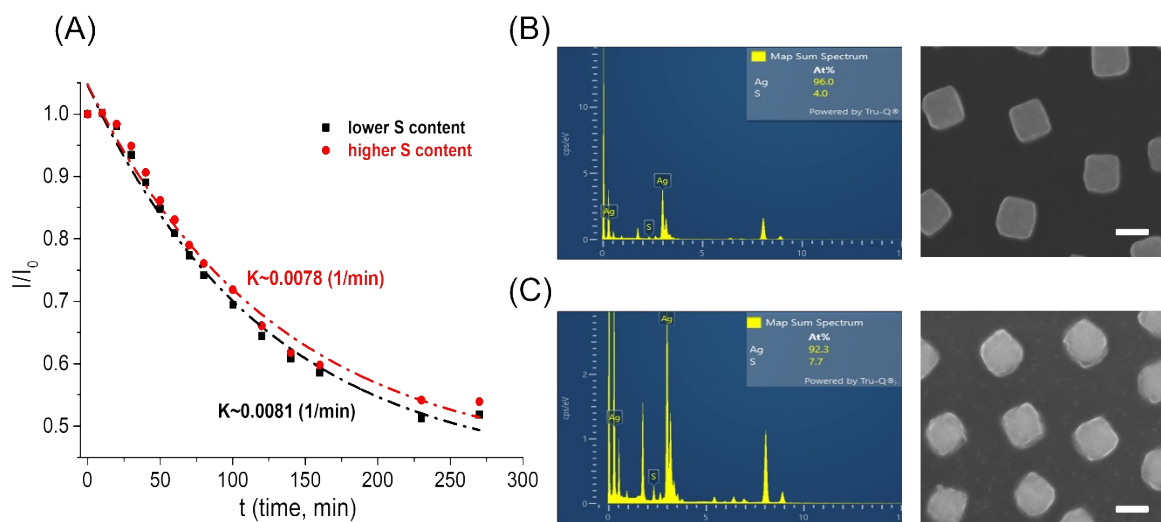

S9 Changes in the concentration of 4-NP under Ag<sub>2</sub>S-AgNC nanocrystals with different S contents as catalysts decayed exponentially with reaction time as shown in (A). There were two different sulfur contents in Ag<sub>2</sub>S-AgNC nanocrystal as catalysts: the sulfur content in Ag<sub>2</sub>S-AgNC nanocrystal was 4.0 at% as EDX shown in (B). And the sulfur content in Ag<sub>2</sub>S-AgNC nanocrystal was 7.7 at% as EDX shown in (C).

Table S6 Stability test and sulfur content-dependent reactivity tests of Ag<sub>2</sub>S-AgNC nanocrystal as catalysts fixed in a polystyrene matrix: curves fitted with exponential decay equations

| Concentration of fixed core shell-<br>Ag <sub>2</sub> S- AgNC (# of substrate) | Fitting formula : $y=y_0+A*\exp(-(t-t_0)/B)$ ; B = 1/ reaction constant (K) |                |       |        |        |          |
|--------------------------------------------------------------------------------|-----------------------------------------------------------------------------|----------------|-------|--------|--------|----------|
|                                                                                | y <sub>0</sub>                                                              | t <sub>0</sub> | A     | B      | K=1/B  | R-square |
| $I_{LSPR} = 5.05$ 1 <sup>st</sup> cycle rxn                                    | 0.4238                                                                      | 22.828         | 0.517 | 123.48 | 0.0081 | 0.984    |
| $I_{LSPR} = 5.05$ 2 <sup>nd</sup> cycle rxn                                    | 0.3520                                                                      | 6.147          | 0.650 | 113.93 | 0.0087 | 0.984    |

| Concentration of fixed core shell-<br>Ag <sub>2</sub> S- AgNC (# of substrate) | Fitting formula : $y=y_0+A*\exp(-(t-t_0)/B)$ ; B = 1/ reaction constant (K) |                |       |        |        |          |
|--------------------------------------------------------------------------------|-----------------------------------------------------------------------------|----------------|-------|--------|--------|----------|
|                                                                                | Y <sub>0</sub>                                                              | t <sub>0</sub> | A     | B      | K=1/B  | R-square |
| $I_{LSPR} = 5.05$ lower S content                                              | 0.4238                                                                      | 22.828         | 0.517 | 123.48 | 0.0081 | 0.984    |
| $I_{LSPR} = 5.05$ higher S content                                             | 0.4392                                                                      | 26.114         | 0.500 | 128.80 | 0.0078 | 0.984    |

Table S7 Flower-like Au-AgNC nanocrystal as catalysts with and without irradiation assistance

| Concentration of fixed flower-Au-AgNC (# of substrate) without irradiation assistance | Fitting formula : $y=y_0+A*\exp(-(t-t_0)/B)$ ; B = 1/ reaction constant (K) |         |        |          |        |          |
|---------------------------------------------------------------------------------------|-----------------------------------------------------------------------------|---------|--------|----------|--------|----------|
|                                                                                       | $y_0$                                                                       | $t_0$   | A      | B        | K=1/B  | R-square |
| $I_{LSPR} = 1$                                                                        | 0.7391                                                                      | 20.9302 | 0.6656 | 240.0767 | 0.0042 | 0.991    |
| $I_{LSPR} = 2$                                                                        | 0.1462                                                                      | 3.8174  | 0.8466 | 190.5623 | 0.0052 | 0.999    |
| $I_{LSPR} = 3$                                                                        | 0.0985                                                                      | 0.2222  | 0.8988 | 152.0171 | 0.0066 | 0.999    |
| Concentration of fixed flower-Au-AgNC (# of substrate) with irradiation assistance    | Fitting formula : $y=y_0+A*\exp(-(t-t_0)/B)$ ; B = 1/ reaction constant (K) |         |        |          |        |          |
|                                                                                       | $y_0$                                                                       | $t_0$   | A      | B        | K=1/B  | R-square |
| $I_{LSPR} = 1$                                                                        | 0.5138                                                                      | 5.6058  | 0.4807 | 216.5481 | 0.0046 | 0.998    |
| $I_{LSPR} = 2$                                                                        | 0.1649                                                                      | 9.8275  | 0.7920 | 168.5371 | 0.0059 | 0.999    |
| $I_{LSPR} = 3$                                                                        | 0.0761                                                                      | 9.7592  | 0.8398 | 123.8766 | 0.0082 | 0.999    |

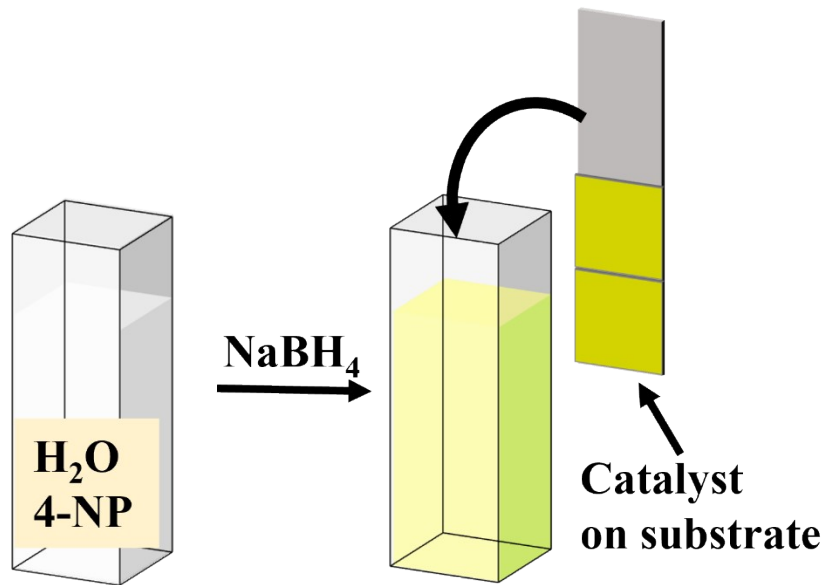

S10 The schematic of reaction equipment setting up which includes the 4-NP aqueous solution in a quartz cuvette. The reducing agent (NaBH<sub>4</sub> aqueous solution) and Ag-based nanocrystals-PS matrix were then added into the quartz cuvette to study the reduction rate of 4-NP.

(A) Reference<sup>1</sup> :

catalyst (Ag nanoparticle):  $1 \times 10^{-9} M$ ,  $300 \mu\text{L} = 3 \times 10^{-13} \text{ mole}$

4-NP concentration:  $1.7 \times 10^{-3} M$ ,  $0.15 \text{ mL} = 2.25 \times 10^{-7} \text{ mole}$

NaBH<sub>4</sub> concentration:  $0.015 M$ ,  $1 \text{ mL} = 1.5 \times 10^{-5} \text{ mole}$

catalyst :4-NP : NaBH<sub>4</sub> =  $1.33 \times 10^{-6} : 1 : 66.7$

(B) Intensity of AgNC = 1.0 → surface coverage % of substrate = 21 %;

substrate size  $1 \text{ cm} \times 1 \text{ cm}$  and AgNC size =  $100 \text{ nm}$  (AgNC project area =  $10^4 \text{ nm}^2$ )

$$\# \text{ of AgNC in substrate} : \frac{10^{14}(\text{nm}^2) \times 0.22}{10^4(\frac{\text{nm}^2}{\text{AgNC}})} = 2.1 \times 10^9$$

$$\frac{2.1 \times 10^9}{6.02 \times 10^{23}(\frac{\# \text{ of AgNC}}{\text{mole}})} = 3.45 \times 10^{-15} \text{ mole}$$

4-NP concentration:  $1.7 \times 10^{-3} M$ ,  $0.15 \text{ mL} = 2.25 \times 10^{-7} \text{ mole}$

NaBH<sub>4</sub> concentration:  $0.4 M$ ,  $0.15 \text{ mL} = 6 \times 10^{-5} \text{ mole}$

catalyst :4-NP : NaBH<sub>4</sub> =  $1.53 \times 10^{-8} : 1 : 266.7$

The amount of catalyst used to treat the same amount of 4NP is 0.0115 times

S11 Comparison of the number of silver nanocrystals in the literature and that used in our experiment when treatment with the same concentration of 4-NP aqueous solution.



Table S8 compared the catalytic performance of Ag-based bicomponent nanocrystals with other literatures.

| Catalysts type           | # of catalyst (mole)                 | 4-NP (mole)            | NaBH <sub>4</sub> (mole) | # of catalyst /4-NP   | Overall rxn time      | Reference |
|--------------------------|--------------------------------------|------------------------|--------------------------|-----------------------|-----------------------|-----------|
| Ag based bicomponent NP  | Ag-Au Flower (fixe catalyst)         | $3.45 \times 10^{-15}$ | $2.25 \times 10^{-7}$    | $6 \times 10^{-5}$    | $1.53 \times 10^{-8}$ | ~250 min  |
|                          | Ag-Au Flower (freely suspended)      | $2.07 \times 10^{-14}$ | $2.25 \times 10^{-7}$    | $6 \times 10^{-5}$    | $9.20 \times 10^{-8}$ | ~ 3 min   |
|                          | Ag-Au cage (fixe catalyst)           | $3.45 \times 10^{-15}$ | $2.25 \times 10^{-7}$    | $6 \times 10^{-5}$    | $1.53 \times 10^{-8}$ | ~175 min  |
|                          | Ag-Ag <sub>2</sub> S (fixe catalyst) | $3.45 \times 10^{-15}$ | $2.25 \times 10^{-7}$    | $6 \times 10^{-5}$    | $1.53 \times 10^{-8}$ | ~350 min  |
| Ag-Au bimetallic NP      | $3 \times 10^{-13}$                  | $2.25 \times 10^{-7}$  | $1.5 \times 10^{-5}$     | $1.33 \times 10^{-6}$ | ~ 3 min               | 23        |
| Ag-Au bimetallic NP + GO | $1.8 \times 10^{-8}$                 | $3.85 \times 10^{-6}$  | $4.4 \times 10^{-4}$     | $4.67 \times 10^{-2}$ | ~ 5 min               | a         |
| Au NP                    | $8.8 \times 10^{-8}$                 | $1.35 \times 10^{-6}$  | $2.145 \times 10^{-3}$   | $6.52 \times 10^{-2}$ | ~5 min                | b         |
| Ag NP                    | $1.39 \times 10^{-5}$                | $3.0 \times 10^{-7}$   | $3 \times 10^{-5}$       | 0.463                 | ~8 min                | c         |

a. Wu, T.; Zhang, L.; Gao, J.; Liu, Y.; Gao, C.; Yan, J. Fabrication of graphene oxide decorated with Au–Ag alloy nanoparticles and its superior catalytic performance for the reduction of 4-nitrophenol. *J. Mater. Chem. A* 2013, 1 (25), 7384–7390.

b. K. Kuroda, T. Ishida, M. Haruta, Reduction of 4-nitrophenol to 4-aminophenol over Au nanoparticles deposited on PMMA, *J. Mol. Catal. A Chem.*, 298 (1) (2009), pp. 7-11.

c. S. Jana, S.K. Ghosh, S. Nath, S. Pande, S. Praharaj, S. Panigrahi, S. Basu, T. Endo, T. Pal, Synthesis of silver nanoshell-coated cationic polystyrene beads: A solid phase catalyst for the reduction of 4-nitrophenol, *Appl. Catal., A*, 313 (1) (2006), pp. 41-48.

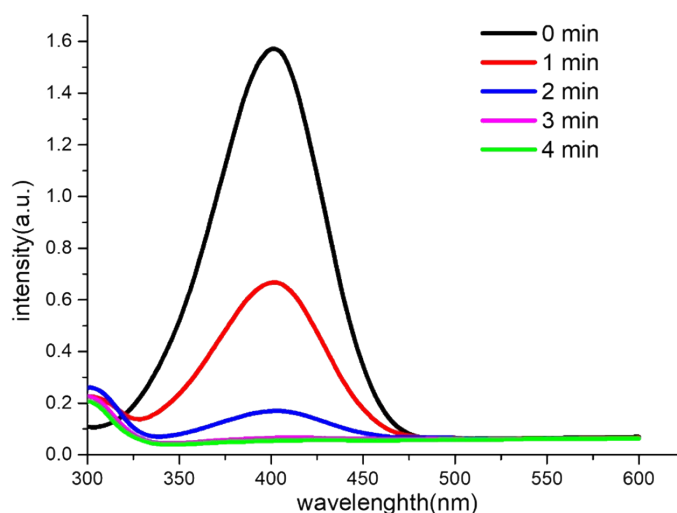

S12 High concentration freely suspended follower-like Au-AgNC nanocrystals (~6 substrates) as catalysts for 4-NP reduction. The extinction spectra of 4-NP showed that the reaction can be completed in about 3 mins.

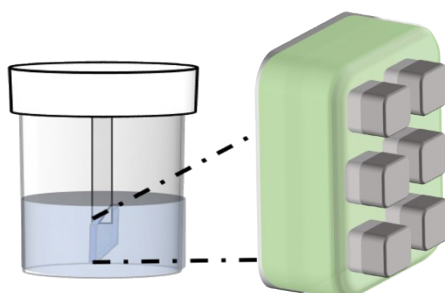

S13 Schematic of the setup used to synthesis bi-component nanocrystals, which partially embedded AgNC as “seeds”.
